1 **Title: Poverty Proofing healthcare: a qualitative study of barriers to accessing healthcare for low**  
2 **income families with children in Northern England.**

3 **Short title: Barriers to accessing healthcare for low income families with children in Northern**  
4 **England.**

5 **Authors:**

6 Elaine Bidmead<sup>1,2\*</sup>, Louise Hayes<sup>3</sup>, Emma Leggott<sup>4</sup>, Josephine Wildman<sup>5, 2, #a</sup>, Judith Rankin<sup>5,2</sup>, Luke  
7 Bramhall<sup>4</sup>, Liz Todd<sup>6</sup>, Laura Mazzoli-Smith<sup>7</sup>

8 <sup>1</sup> Institute of Health, University of Cumbria, Carlisle, Cumbria, United Kingdom.

9 <sup>2</sup> National Institute for Health and Care Research (NIHR) Applied Research Collaboration (ARC), North  
10 East and North Cumbria, Newcastle Upon Tyne, Tyne and Wear, United Kingdom.

11 <sup>3</sup> National Institute for Health and Care Research (NIHR) Research Development Service (RDS) North  
12 East and North Cumbria, Population Health Sciences Institute, Newcastle University, Newcastle upon  
13 Tyne, Tyne and Wear, United Kingdom,

14 <sup>4</sup> Children North East, Newcastle upon Tyne, Tyne and Wear, United Kingdom.

15 <sup>5</sup> Population Health Sciences Institute, Newcastle University, Newcastle upon Tyne, Tyne and Wear,  
16 United Kingdom.

17 <sup>6</sup> School of Education, Communication and Language Sciences, Newcastle University, Newcastle  
18 upon Tyne, United Kingdom.

19 <sup>7</sup> School of Education, Durham University, Durham, County Durham, United Kingdom.

20 #aCurrent address: ScotCen Social Research, Edinburgh, Scotland.

21 \*Corresponding author

22 [elaine.bidmead@cumbria.ac.uk](mailto:elaine.bidmead@cumbria.ac.uk)

**NOTE: This preprint reports new research that has not been certified by peer review and should not be used to guide clinical practice.**

## 23 **Abstract**

24 Poverty impacts negatively on children's health and future life chances. Access to the UK's National  
25 Health Service (NHS) is based on clinical need rather than the ability to pay but horizontal inequities  
26 in access exist. Children North East, a charity supporting children experiencing poverty, wanted to  
27 develop a Poverty Proofing© Health tool to help NHS services reduce the impacts of poverty on  
28 access. This study aimed to understand barriers to healthcare access faced by families living on low  
29 incomes to support development of the tool. Twenty parents and seven Voluntary Community Social  
30 Enterprise sector staff participated in qualitative interviews or focus groups. Data were analysed  
31 thematically, and three main themes were identified as impacting access to healthcare: hidden  
32 costs, securing appointments and developing relationships with healthcare providers. We conclude  
33 that low-income families experience both financial and other barriers to accessing NHS healthcare  
34 and that these barriers are exacerbated for low income families living in rural areas.

35

## 36 **1. Introduction**

37 Poverty is a major determinant of health and life opportunities that impacts negatively on children's  
38 futures. Poverty occurs when people's resources are well below their minimum needs [1]. A recent  
39 UK report shows that 'children born into the poorest fifth of families in the UK are almost 13 times  
40 more likely to experience poor health and educational outcomes by the age of 17 years' [2]. Children  
41 experiencing poverty are at greater risk of becoming overweight, developing asthma and having  
42 tooth decay, as well as performing poorly at school [3]. Poverty also increases the risk of poor  
43 mental health [4] and early adulthood mortality [5,6]. Children and young people in the UK report  
44 that poverty has a negative effect on their wellbeing and causes feelings of exclusion, shame and  
45 unfairness [7].

46 In 2021-2022, 29% of UK children lived in poverty [8]. In June 2023, the figure was substantially  
47 higher (35%) in the North East of England [9]. Poverty is a significant cause of the UK North-South  
48 divide in children's life chances as it limits access to the circumstances that help to ensure good  
49 health [10].

50 Children North East (CNE) is a charitable organisation founded to support children living in poverty.  
51 In 2011, children working with CNE identified an end to discrimination in school as their main  
52 priority. In response, CNE, with support from the North East Child Poverty Commission, developed  
53 'Poverty Proofing© the school day'. This is an audit and action-plan development tool for schools  
54 which aims to remove poverty-related barriers to learning [11].

55 Access to the UK's National Health Service (NHS) is based on clinical need rather than an individual's  
56 ability to pay. It is free at the point of delivery irrespective of financial circumstances. However,  
57 'horizontal inequities' exist in healthcare utilisation [12]. While poorer health in poorer people  
58 results in them consuming more healthcare (at every age), richer people tend to access healthcare at  
59 an earlier stage and consume more preventive and specialist care [12, 13].

60 This study aimed to identify barriers to healthcare access among families with children living on low  
61 incomes (commonly defined in the UK as below 60% of the median income [14]) with the objective  
62 of designing an action-plan toolkit for Poverty Proofing a range of healthcare settings. The work was  
63 conducted during a period when the NHS was experiencing service pressures due to increased  
64 demand from COVID-19, workforce issues, and the impacts of austerity. Comments during data  
65 collection made clear that these pressures had created a situation in which access to health services  
66 (such as appointments with dentists, General Practitioners (GPs) and hospitals) was challenging for  
67 many people, irrespective of financial circumstance. In this paper we focus on issues impacting  
68 access to healthcare that are amplified by low-income. The results presented informed the  
69 development of a Poverty Proofing audit tool.

70        **2. Material and methods**

71        The COnsolidated criteria for Reporting Qualitative research (COREQ) [15] were used to guide our  
72        research design; our COREQ checklist is attached as appendix A.

73        **2.1 Sample and Recruitment**

74        Data collection was undertaken with parents on low-incomes and with professionals working in the  
75        Voluntary, Community and Social Enterprise (VCSE) sector who support people on low-incomes.

76        Recruitment commenced 9 December 2021 and ended 16 June 2022.

77        Parent participants were purposively recruited via VCSE organisations in the North East and North  
78        Cumbria. VCSE organisations were supplied with study information sheets which they shared with  
79        service users they identified as experiencing low-income (number unknown). Participants were  
80        offered a £20 gift voucher to thank them for their contribution. Twenty parents volunteered; none  
81        were known previously to the researchers.

82        Three VCSE organisations working in health and wellbeing were contacted by email, supplied with a  
83        study information sheet, and invited to contribute to the research. Organisations were offered  
84        compensation of £20 per person participating. Eight staff members volunteered to participate. All  
85        were based in North Cumbria and two were known to EB previously.

86        No participants dropped out. The number of parents/VCSE staff choosing not to participate is  
87        unknown.

88        **2.2 Ethics**

89        Ethical approval for the study was granted by Newcastle University Research Ethics Committee  
90        (Reference: 2236/15258 Date: 23/11/2021).

91        All participants were provided with written and verbal information about the study and invited to  
92        ask questions prior to participating; all provided written informed consent before taking part.

93        **2.3 Theory, design and setting**

94 This study employed a critical realist, contextualist approach to gather and understand participants'  
95 situated experiences of accessing NHS health services whilst living on low incomes.

96 A topic guide was devised to structure and facilitate in-depth one-to-one interviews and focus  
97 groups; it was piloted with two parents and no amendments were made. The topic guide prompted  
98 participants to think about different aspects of healthcare, including getting appointments, accessing  
99 appointments, emergency situations, and staff attitudes; it also allowed participants to introduce  
100 issues significant to them.

101 Data collection was undertaken by EB and LH. Both are female, mid-career researchers (educated to  
102 PhD level) trained and experienced in qualitative data collection methods and analysis. Researchers  
103 shared with participants their names, job roles, qualifications, and reasons for doing the research.

104 Data were collected between December 2021 and June 2022; one round of data collection was  
105 undertaken. Interviews with parents were conducted via online video using Microsoft Teams or  
106 Zoom, six by LH and one by EB. Interviews lasted between 15 and 60 minutes and were recorded  
107 and fully transcribed. Four parent focus groups were conducted in community venues and facilitated  
108 in person by LH. Parent focus groups lasted between 40 and 60 minutes; three were audio-recorded  
109 and fully transcribed; notes were taken in the fourth. The interview and two focus groups with VCSE  
110 staff were conducted by EB via online video using Microsoft Teams; they lasted between 60 and 80  
111 minutes and were recorded and fully transcribed. No others were present during data collection  
112 besides the researchers and participants. Transcripts were not shared with participants.

#### 113 **2.4 Analysis**

114 Anonymised transcripts were analysed using 'reflexive thematic analysis' [16]. Following  
115 familiarisation with the data, a sample of six transcripts were independently coded by two researchers  
116 (EB and LH), inductive codes emerged from the data; deductive codes aligned with the topic guide.  
117 The two researchers then met to discuss codes and construct initial themes. Having agreed the coding

118 frame all transcripts were coded by one researcher (EB) using NVIVO. Following coding, initial themes  
119 and coded data were discussed at team meetings and the main themes were agreed.

### 120 3. Results

121 Semi-structured interviews were conducted with seven parents (all mothers) aged between 20-60  
122 years, four of whom were lone parents. Thirteen parents (12 mothers and one father), aged 20-40  
123 years, participated in one of three focus group discussions. Seven staff took part in focus group  
124 discussions and one in a semi-structured interview; all were female and aged over 30 years. The  
125 results presented below include illustrative quotations to provide rich and faithful accounts; each  
126 transcript was given an identity code to indicate whether data came from a parent interview  
127 (ParentInt), parent focus group (ParentFG), VCSE interview (VCSEInt) or VCSE focus group (VCSEFG).

128 Contributors commented on the challenges of living in poverty which we discuss first. Next, we  
129 present thematic findings. We identified three main themes: hidden costs, securing appointments  
130 and developing relationships with healthcare providers. We then discuss contributors' awareness of  
131 sources of financial assistance for accessing healthcare followed by contributors' suggestions for  
132 improvements.

#### 133 3.1 Living on a low income

134 Some parents shared the challenges of living with financial hardship. It was typically described as  
135 hard, stressful, embarrassing and stigmatising:

136 "It's a big struggle on a on a day-to-day basis ... It's like this week it's my, my poor week as I  
137 call it, I get like £63 today to last me a week and out of that I've got my bills to pay, my food  
138 to pay ... it's just impossible to live on." (ParentInt1)

139 Participants in ParentFG2 spoke about the embarrassment felt at having to ask for assistance due to  
140 financial hardship. ParentInt2 shared the stigmatising effects of poverty: "*stigma about people*  
141 *claiming benefits, and 'Oh, you're useless,' and, 'You're timewasters and scroungers.'*" They stressed

142 that they had always worked until their child was born with significant health needs and explained  
143 that they were “quite proud”; being asked to prove they were in need was highly embarrassing to  
144 them, for example:

145 “You either have to print off a statement, which to me is embarrassing, because it’s got  
146 every bit of how they break down how much you’re going to get paid ... the other thing that I  
147 find quite embarrassing is, if, for example, my son’s admitted into hospital, ... they’ll ask me  
148 about what our situation is. Do I work or don’t I work? And do we have social worker? ... And  
149 I feel that’s quite probing ... I think there’s a lot of things that could be improved on, to make  
150 you feel not as scummy about the way you are.” (ParentInt2)

151 VCSE contributors described what living in poverty meant to them. Descriptions highlighted both  
152 absolute poverty (reliance on food and clothing banks) and relative poverty (having to do without  
153 luxuries, holidays, family days out etc.). Living in financial hardship was thought to impact people’s  
154 long-term health and resilience due to poor diet and limited social engagement (VCSEFG1). VCSE  
155 contributors also emphasised the stress caused by poverty and the complex, layering and cumulative  
156 impacts it has on families, which can become overwhelming.

157 “Poverty ... It's an overwhelm with lots of different factors that eat you away, until you feel  
158 like you have few options.” (VCSEInt1)

159 “It's bad enough if you have a child with a physical need ... If you add on the fact that if  
160 there's poverty and you've got a battle with the health system ... you know it's all about  
161 those layers.” (VCSEFG2)

162 Like parents, VCSE contributors highlighted people’s embarrassment about their financial situations  
163 because “families often feel judged” (VCSEFG2). Consequently, some attempt to hide or disguise the  
164 effects poverty has on their lives.

165 VCSEFG2 pointed to situations where the impacts of poverty may be misconstrued and understood  
166 instead as neglect. For example, one participant highlighted the practice of setting targets for  
167 parents during Child Protection or Child in Need Plan meetings, such as attending health  
168 appointments. They noted *“if you weren't actually able to access the appointment because of*  
169 *difficulties getting there”* then that may be seen as the parent not complying:

170 “Some families will go down the I can't afford it. Others won't say that because they'll be  
171 fearful of ‘Well, if you can't afford to go to health ... what's happening there’ and they will  
172 come over as disengaged and difficult when actually they can't, they cannot, actually  
173 manage to get there because of finance.” (VCSEFG2)

## 174 **3.2 Hidden Costs – financial barriers to accessing healthcare**

### 175 **3.2.1 Transport**

176 Transport costs emerged as a major barrier to accessing healthcare for low-income families. Most  
177 could access GPs locally and so could attend relatively easily, but attending hospital appointments  
178 often involved longer journeys and several buses if undertaken by public transport, or excessive  
179 parking fees if undertaken by car.

180 Contributors indicated numerous times that the costs of transport to appointments were a concern  
181 to them and these costs increased exponentially for parents with multiple appointments, living in  
182 remote/rural areas, or having to travel long distances to access secondary care. There were also  
183 significant time implications for parents living in remote areas without access to a vehicle, one  
184 parent from a rural village elaborated:

185 “It's about 25, 26 mile away so like I say to get to [large town], you've either got to get a taxi  
186 ... to [small town] and then a train ... to [large town] ... or get a bus which takes about 45  
187 minutes. The train takes about 10 minutes, but they don't run as often ... For a taxi into  
188 [small town] its £15 each way ... The train I think it's about £7 or £8 return now ... for both of



189 us, you're looking, by the time you get taxis and that, you're looking at 50 odd pound before  
190 you even get to the appointment [...] So, you have to cancel appointments or work around  
191 it." (ParentInt1)

192 In rural areas, people may be required to access secondary care at sites across the region,  
193 irrespective of where they live. Where people are referred is determined by the availability of  
194 appointments. However, people on low incomes face the dilemma of covering significant costs or  
195 delaying their healthcare:

196 "Where health authorities are trying to squeeze you in for an appointment and not make  
197 you wait, they will offer you say [hospital name] ... for some families, that's easy enough  
198 [but] often it's a choice of getting yourself over to another hospital ... taking the day off work  
199 or waiting maybe a month or two, you know, for your child to be seen, which is a really  
200 difficult decision to make [...] they say you aren't forced to go there, you can wait ... so that  
201 while you're not denied healthcare it will be delayed, not through your lack of engagement,  
202 not through you not putting your health or your children's needs first, it's because of the  
203 affordability of the offer of what your appointment looks like." (VCSEFG2)

204 When it comes to accessing tertiary care, such challenges are exacerbated. VCSEFG1 commented  
205 upon the number of people in North Cumbria having to travel "*out of county*" for treatment. For  
206 example, for specialist children's services, "*Newcastle's the closest or ... it's Manchester*" (VCSEInt1).  
207 This entails expensive and time-consuming travel and potentially lost earnings if time off work is  
208 necessary. One parent in rural North Cumbria highlighted the journeys involved in accessing care for  
209 their child 'out of county':

210 "I went to see [consultant], so of course that incurred money for going across to [hospital in  
211 Newcastle], and then he asked for an MRI scan, which [hospital in North Cumbria] did, and  
212 then he sent me an appointment to have an MRI scan done with contrast, but at [another  
213 hospital in Newcastle]." (ParentInt2)

214 This means some people simply cannot afford to attend hospital appointments, a situation that is  
215 compounded where multiple appointments are involved.

### 216 **3.2.2 Subsistence during hospital attendance**

217 Paying for food and drinks during hospital attendance emerged as a significant challenge for parents  
218 who could not afford the costs involved; this was an issue when children were outpatients and  
219 inpatients. Parents highlighted the limited options within hospitals to buy food, and stressed the  
220 expense of hospital food outlets:

221 “Hospital food is not affordable ... I just had to find the money. My mam would help us out a  
222 lot. My daughter’s grandad would help. But it is still too much to pay back.” (ParentInt5)

223 “Even getting a cuppa, it’s like a fiver in the hospital.” (ParentFG3)

224 Costs increased when children were inpatients. It was reported that no food is given to parents  
225 staying with a child, no matter their age; parents reported living on “*Sub-Way sandwiches*” and “*Pot*  
226 *Noodles - but I can’t see it being nutritionally balanced*” (ParentInt6). Two parents had experienced  
227 extended hospital stays when their babies were born with health complications. Both stayed in  
228 charitable accommodation at hospitals; these provided cooking and laundry facilities. However,  
229 neither regularly used these due to financial and time pressures which then impacted their ability to  
230 eat healthily; both reported missing meals and not looking after themselves properly. ParentInt7  
231 explains:

232 “There are so many costs that you just can’t anticipate beforehand ... Obviously, food is a  
233 massive one ... just through time, I would have to eat in the canteen quite a lot, so I missed  
234 quite a lot of meals because of that [...] and I couldn’t keep going back and forth to the  
235 accommodation because it is quite a way from the hospital, and I was expressing milk like  
236 18-20 hours a day [...] You don’t think, I should take toilet paper, or washing powder. Yeah,  
237 even now I probably can’t think of half of the unexpected costs that came up [...] And then

238 the cost of food is a lot higher because you've got to buy ready meals. We were buying stuff  
239 we would never normally eat because it was [fast], and of course it cost more." (ParentInt7)

240 Whilst some preparedness may be expected for planned admissions, this is not possible with  
241 emergency admissions which were reported to trigger even more expenditure. VCSEInt1 highlighted  
242 the realities of emergency admissions for parents:

243 "As we know from our stats, that's likely to be an ambulance admission. So, they're less  
244 likely to have what they need with them. They're less likely to have the people that they  
245 need with them [...] you'd be lucky if you find a vending machine. You'd be lucky if you've  
246 got the right change on you for the vending machine and you'd be lucky if the vending  
247 machine's got anything in it other than tea or coffee. I think you might find that a kind nurse  
248 might offer you a cup of tea and a piece of toast, if they're not rushed off their feet."

249 This scenario was confirmed by parents, for example:

250 "I didn't have a budget for when he got rushed into hospital, because nobody knew it was  
251 going to happen. So, then I was borrowing money and things like that, just to travel over  
252 there and back." (ParentInt1)

253 On a positive note, two parents mentioned specific nurses or wards being helpful in terms of  
254 providing food and drinks, but this was dependent on the actions of individual staff members rather  
255 than hospital policy.

### 256 **3.2.3 Discharge from hospital**

257 Participants highlighted the costs associated with discharge from hospital following an admission by  
258 ambulance. This is a particular issue when the emergency department is a significant distance from  
259 home and if discharge occurs when public transport is not operating. Hospital discharge "*could be*  
260 *any time of the day; it could be at any time of the night*" (VCSEFG2) and "*Your only option for getting*  
261 *home without any transport would be a taxi*" (VCSEInt1). Parent5 described attending emergency

262 departments several times; each visit requiring a taxi. Sometimes their child would be admitted, but  
263 at others they would give medication and discharge them, *“so that would be another £30 taxi fare*  
264 *back home”* (ParentInt5).

### 265 **3.2.4 Parking costs**

266 For parents who owned a vehicle parking charges were a concern; they were said to be around *“£2*  
267 *or £3 an hour”* which *“obviously you don’t have”* (ParentFG3). This view was repeated by VCSEFG1  
268 where it was mentioned that *“parking is always an issue because of the extra costs parking brings”*  
269 which caused stress *“because you’d never know how long”* you will need. ParentInt2, whose child  
270 was in hospital for several weeks, reported high parking charges when their partner drove from  
271 North Cumbria to Newcastle at weekends. After a time, somebody mentioned cheaper parking that  
272 could be used but this involved using a shuttle bus to the hospital, which took up time and was not  
273 available at weekends.

### 274 **3.2.5 Impacts on income**

275 Some contributors spoke about lost income due to attending appointments with children. ParentInt2  
276 reported losing pay from having to miss work when their child was ill because they did not *“qualify*  
277 *for sick pay”*. ParentInt7 reported their spouse’s employer was *“good about giving some time off”*  
278 when their child was in hospital but they *“didn’t actually get paid.”* A contributor in VCSEFG2  
279 highlighted that some families cannot take time off work because it will affect social security  
280 payments.

281 For others, having an ill child had resulted in them losing employment. Contributors in VCSEFG2  
282 talked about several parents who gave up employment because they found working whilst caring for  
283 an ill child impossible and decided it was *“too much to be able to juggle all these things and meet my*  
284 *child’s needs”*. Another added that *“the way that health services shape themselves impacts”* because  
285 people must choose between *“working or putting children first”*; they highlighted *“the amount of*

286 *negotiation you have to do to try and get not every single health appointment in the middle of the*  
287 *day. You know, it's, it's impossible"* (VCSEFG2).

### 288 **3.3 Securing Appointments**

#### 289 **3.3.1 Digital first**

290 The issue of digital access to health services was raised on several occasions, as was the expectation  
291 that everyone has a smart phone or internet access with unlimited calls/data. Parents questioned if  
292 people on low incomes did. For example, whilst some participants at ParentFG4 noted the easiest  
293 way to get a GP appointment was via an app, one shared that they did not have a smart phone nor  
294 access to a computer.

295 VCSE contributors referred to a digital divide wherein *"you are less likely to have a laptop if you don't*  
296 *have the money"* (VCSEFG1). COVID-19 was seen to have accelerated the move to digital first  
297 services, which many people have adapted to over time, but *"other people haven't been able to just*  
298 *because they can't afford it"* (VCSEFG1). A participant in VCSEFG2 pointed to the requirement to  
299 have a mobile phone to receive a code that enabled one to access lateral flow tests for COVID-19.  
300 VCSEInt1 noted that:

301 "We absolutely know that the majority of people [experiencing financial hardship] need face  
302 to face engagement because they need to build up trust with their caregiver and ... we do  
303 know that a lot of people will avoid digital connection and will only go for face-to-face  
304 connection because that's the way that they work. That's the way they've always operated."  
305 (VCSEInt1)

#### 306 **3.3.2 GP Appointments**

307 Whilst not directly related to family poverty, almost all participants described difficulties in securing  
308 GP appointments, for example: *"not being able to get appointments when you need them ... waiting*  
309 *weeks and weeks, and weeks"* (ParentFG1). Others reiterated this experience; one *"waited two*

310 *months*” for a GP appointment regarding “*a water infection*” by which time “*it was a kidney*  
311 *infection*” (ParentFG1). VCSE contributors also highlighted the difficulties experienced by service  
312 users in getting appointments due to “*massive waitlists, wait times*” (VCSEInt1).

313 Having to telephone the surgery for appointments was highlighted as problematic, participants  
314 described waiting on hold for long durations or having to call multiple times:

315 “I was in the queue for half an hour or 45 minutes. And then she said, ‘*It’s really busy, I can’t*  
316 *give you an appointment, you can try tomorrow.*” (ParentInt4)

317 “You’re having to ring 30 to 90 times to get through ... I think the record is 124 to get an  
318 appointment one morning.” (ParentInt6)

319 Specific issues with telephone consultations were also reported. Contributors resented having to  
320 wait in for doctors to telephone as “*they won’t give you a time for them ringing you back ... you’ve*  
321 *got to be free all day. If you miss that day, then you’ve really had it*” (ParentFG3). ParentInt1  
322 reported similarly and commented “*It stops me from ringing the doctors more times than enough to*  
323 *be fair*” (ParentInt1).

324 Two important factors emerged for low-income families alongside these issues. First was the cost of  
325 being on hold for extended durations. VCSE contributors pointed to an assumption that all patients  
326 have access to free calls on their home or mobile phones and have data for online access, which is  
327 not the case for families facing financial hardship, who are more likely to be on a basic landline  
328 tariffs or pay as you go and have limited data on their mobile phone.

329 “If it’s ringing, it’s free and people just assume that people don’t want that, and they don’t  
330 want to be ringing, they want to be in a queue. But ... that starts the pennies ticking for  
331 people who have to pay for their calls.” (VCSEFG2)

332 The second issue to emerge was that these difficulties discouraged people from trying to obtain  
333 appointments, potentially exacerbating conditions, with some choosing to access Accident and  
334 Emergency Departments instead:

335 “They're not even bothering ... because they can't get through to them. So, they won't even  
336 bother ringing, they won't ring for the children, they won't ring for their husbands and won't  
337 ring for themselves anymore and they will go, if it's an emergency, they would go to the  
338 hospital. But apart from that they've not even tried, they've just stopped ringing because  
339 they don't, they just don't see the point anymore.” (VCSEFG1)

340 “The system seems quite complex to navigate, sometimes you've got to ring up and then  
341 listen to something ... some of my families find that really difficult, and they find it so  
342 frustrating. I've actually got a family who are more likely to ring, do a 999, you know, call a  
343 blue light, than actually, you know, ring through for ... a GP appointment.” (VCSEFG2)

344 Contributors in VCSEFG1 also highlighted issues in getting appointments for those working in more  
345 than one job, non-standard hours or with inflexible employment terms who might not be able to  
346 take time off work, and for whom time off may result in loss of income. Consequently, parents had  
347 not attended appointments “*because they just couldn't get time off work*” (VCSEFG1).

### 348 **3.3.3 Dental Appointments**

349 The difficulties of accessing NHS dental care are a national problem that has been highlighted  
350 extensively in national media in recent months. Indeed, many people have little option but to access  
351 dental treatment privately “*but that's not the case for people that don't have the money to do that*”  
352 (VCSEFG1). However, even NHS treatment is expensive to those on low incomes. ParentInt5  
353 explained that charges might prevent them from seeking treatment: “*if I had to pay for that extra*  
354 *treatment, I wouldn't get it done*” (ParentInt5).

355 Moreover, participants in ParentFG4 reported routinely waiting 12-18 months for appointments for  
356 their children, during which time their oral health had deteriorated and children were in pain. This  
357 scenario was repeated in ParentFG3, for example: *“Trying to get an appointment at the dentist is like*  
358 *a needle in a haystack. You can’t get one”; “they said I couldn’t get an appointment until next year”*.  
359 Problems of access to NHS dentistry appeared greater in rural areas where many dental surgeries  
360 have closed resulting in people having extended journeys to access treatment, with ParentInt7  
361 travelling 40 miles to access an NHS dentist. One VCSE contributor in VCSEFG1 suggested that poor  
362 dental health is once more becoming a marker of poverty.

### 363 **3.3.4 Navigating and negotiating appointments**

364 VCSE contributors commented on the difficulties some families face in navigating and negotiating  
365 health appointments. The healthcare system was described as a *“minefield”* involving complicated  
366 referral systems and criteria, and what often feels like arbitrary decision making. The system was  
367 said to be challenging to negotiate even for those with knowledge of it; for families without such  
368 knowledge, it can be debilitating and exhausting, as well as expensive and resource intensive due to  
369 having to make multiple telephone calls and searches for information:

370 “It feels like they’re having to jump through the hoops ... they might be feeling are we at the  
371 bottom of the pile? Or is it just because of COVID? Or is it just that, you know, our needs are  
372 being ignored” (VCSEFG2).

373 VCSEInt1 highlighted people’s inability or reluctance to advocate for their healthcare and that of  
374 their families as well as poor awareness of what is available to them *“so they’re not even accessing*  
375 *those support and services. You know they’re not asking for the referral.”* VCSEInt1 ventured that few  
376 of us are *“good at asking for help when we think we should”* and most of us *“leave it too late,”* but  
377 where there are poverty issues *“you leave it even later”*.

### 378 **3.3.5 Appointment times**



379 Parents commented on the difficulty of getting children to appointments due to having no control  
380 over appointment times. Appointment times determined by healthcare providers often clashed with  
381 other responsibilities, such as taking other children to school and work. Some preferred  
382 appointments outside the school day to avoid missed education for children, but others preferred  
383 appointments during school times so they did not have to take the whole family with them.  
384 ParentInt6, whose child was on a child protection plan, spoke about how hospital appointments  
385 could sometimes clash with requirements of the plan, but hospital appointments were not easy to  
386 change, *“a lot of them are ... an afternoon clinic once a month or you have to go to this hospital 16*  
387 *miles down the road”*. VCSEInt1 also commented on the difficulty of altering hospital appointment  
388 times, even where long journeys are involved, *“I think you're entirely at the mercy of what comes*  
389 *through on the letter.”*

### 390 **3.3.6 Childcare**

391 Parents talked about challenges in finding suitable childcare so that they or their other children  
392 could attend appointments. Participants in ParentFG1 talked about the possibility of using breakfast  
393 or after school clubs, but this was more expensive. Moreover, several parents reported not having  
394 anyone readily available to provide childcare. This situation was recognised by VCSE contributors  
395 who reported that childcare impacted access to healthcare for parents and children alike. Both  
396 VCSEFG1 and VCSEFG2 referred to whole families presenting at accident and emergency  
397 departments because they had no one to leave children with.

### 398 **3.4 Relationships with healthcare providers**

399 Some parents commented on difficulties they had experienced in forming trusting relationships with  
400 healthcare staff. Not receiving care consistently from the same healthcare professional and having  
401 to keep *“explaining yourself over and over”* was a particular issue for parents in ParentFG4. Parents  
402 offered little comment on healthcare providers' responses to poverty beyond recognising and

403 valuing moments where healthcare staff went out of their way to be helpful – for example, in the  
404 provision of food and drinks.

405 All VCSE contributors were supportive towards healthcare staff and acknowledged the pressures  
406 facing the NHS, for example: most people’s experiences of *“health professionals have been positive;  
407 most people go into the job for the right reasons and are kind, caring and helpful”* (VCSEInt1).

408 Nonetheless, VCSE contributors held concerns over how healthcare providers respond to poverty:  
409 *“organisationally there are obviously some issues”* (VCSEFG2).

410 Contributors in VCSEFG2 contemplated whether clinical staff were trained or supported to think  
411 explicitly about poverty; in their experience, where solutions to poverty issues had been presented it  
412 had been *“individuals who've done that as opposed to a systemic approach”*. VCSEInt1 pointed to  
413 some healthcare staff that are *“authoritative; don't really listen”* which they felt was potentially  
414 related to *“training issues and recruitment issues in medical school”* in that so many *“medical  
415 students are from private school”* and that *“GPs tend not to do their placements in deprived areas”*  
416 (VCSEInt1).

417 A contributor in VCSEFG2 pointed to an expectation within health services that patients can comply  
418 with available provision and when they cannot it is seen as a problem with the patient rather than  
419 the system. Another provided an example of when a single parent with four children did not take  
420 one of them to an *“urgent appointment”* because they had no childcare for the others. Whilst the  
421 parent had been supported to rearrange the appointment, their decision prompted involvement  
422 from other services:

423           *“So, [they] felt judged that, [they were not] able to get to that particular appointment at the  
424 correct time [because they] had made that decision that, actually, I can't leave my children  
425 alone, and I'm going to have to stay with them.”* (VCSEFG2)

426 VCSE contributors also pointed to issues with communications between patients and healthcare  
427 providers; they perceived that access to healthcare information was largely determined by an  
428 individual's ability to navigate and communicate with the system, which was particularly challenging  
429 to people with poor literacy, health literacy and digital access/skills. VCSEInt1 highlighted the lack of  
430 services to support people who are *"overwhelmed or just don't quite understand or can't cope"*.

### 431 **3.5 Awareness of financial assistance for health-related costs**

432 There was a general lack of awareness about sources of financial assistance for health-related costs.

433 The provision of such information appeared arbitrary, with some people gaining awareness by good  
434 fortune and others never becoming aware of it. Participants in ParentFG4 commented about only  
435 finding out about support services and financial help by chance. ParentInt1 had *"no idea about  
436 anything"* and could not recall it ever having been mentioned. However, the idea of applying for  
437 assistance appeared burdensome: *"If you've got to think about support on top of that to get to  
438 doctors and stuff like that, it's another thing you're having to constantly think about"* (ParentInt1).

439 In contrast, ParentInt6 was aware that hospital transport might be available *"but you have to be  
440 ready two hours before and you could be waiting up to two hours after"*, which is not ideal when  
441 taking children. However, they reported that *"if you ask about the transport, they can be quite shifty  
442 with you, especially if you're young ... we need to keep it for the older generation, as I've been told"*  
443 (ParentInt6).

444 ParentInt7, had claimed travel costs for hospital visits and explained that it was relatively easy at  
445 larger hospitals where *"you can go straight to the cashier's office"*. However, there was no cash  
446 office at their local hospital, and this meant completing a form and waiting *"about six months and  
447 then you get a cheque"*. ParentInt7 explained that they discovered they were entitled to financial  
448 support by searching on Google, although the information found was not particularly helpful and *"so  
449 convoluted."*

450 VCSE informants held little awareness of how to access financial support for health-related costs.

451 VCSEFG1 pointed to *“the amount of time it takes to look for the resource and support you can*  
452 *access”* and commented that people *“just don't have the time to do that because you're too busy*  
453 *trying to live your life; trying to work”*.

### 454 **3.6 Suggested improvements**

455 Several suggestions for how to improve access to healthcare for families living on low incomes were  
456 made.

#### 457 **3.6.1 Financial and practical assistance**

458 ParentInt2 commented on awareness of help with financial costs for healthcare. They stated that  
459 had they known they were entitled to help due to low-income then they would have claimed but  
460 suggested that although they had read about assistance *“in one of the leaflets, for one of the*  
461 *hospitals”*, they were not sure whether they were entitled because *“it doesn't say how, it doesn't say*  
462 *in what circumstances”*. Therefore, ParentInt2 felt that information on help with healthcare costs  
463 should be included in letters sent out by healthcare providers and Universal Credit, something that  
464 says, *“If you're on this benefit, you can be entitled to this.”*

465 Other parents suggested ways to help with subsistence. ParentInt6 suggested providing vouchers to  
466 use at food outlets. ParentInt7, who had stayed in charitable accommodation, suggested provision  
467 of a starter pack for parents with *“some washing powder and toilet paper, all of that kind of stuff.”*

468 Participants in ParentFG1 discussed being *“embarrassed to ask”* for things that would help but felt  
469 this would be easier if things were offered; they thought services should *“offer, and overly offer.”*

470 ParentInt7 was aware financial assistance was available but had found claiming *“just so very hard”*  
471 and *“quite dehumanising”*; they felt staff could be more helpful:

472           *“They were just sometimes so rude and horrible to you, that it almost prevented you from*  
473           *[claiming], I'd really think, do I really need...? Can I manage without this money? Because it*

474 was horrible, absolutely horrible ... They should definitely not be making it difficult and  
475 making it feel like there's any stigma or anything. It's thinking about how to completely get  
476 rid of that."

477 VCSE contributors all wanted increased awareness of financial support for healthcare costs.  
478 Contributors in VCSEFG1 identified knowledge about financial assistance to be a "*big problem*".  
479 VCSEInt1 believed that at the very least, people should be made aware of available financial support,  
480 but also about any flexibility there may be around appointment times which would make attendance  
481 cheaper and more achievable. VCSEFG2 suggested awareness of assistance was so low, even  
482 amongst VCSE staff, that research was needed to clarify "*what support is available*" and for it to  
483 become "*habit that health providers include that in their letters*". Both VCSEFG1 and VCSEFG2  
484 suggested having leaflets and posters in areas of high footfall, schools, GP surgeries and all  
485 healthcare settings. Another contributor, in VCSEFG2, mentioned having seen posters on the doors  
486 of supermarket toilets which said "*if you struggle to pay for sanitary products just go to customer*  
487 *service and ask for Sandy or something like that*". The group believed something similar would work  
488 in healthcare settings.

### 489 **3.6.2 System changes within healthcare**

490 VCSEInt1 wanted to see more flexibility around appointments times:

491 "Because at the moment we just feel lucky if you get an appointment ... it's such a battle. But  
492 ... if you've got a long journey, and especially if you've got other caring responsibilities or  
493 employment responsibilities, the more flexibility the better." (VCSEInt1)

494 VCSEFG2 felt that patients should be able to "*interact in the way that the doctor surgery wants you*  
495 *to at no cost*." They also wanted pre-bookable GP appointments made available to families, which  
496 they thought important for planning transport, especially for fitting appointments around the school  
497 day and other children's care. Furthermore, for parents whose children have health conditions,

498 getting GP appointments can feel like a constant trial so pre-bookable appointments would ease  
499 their stress: *“you know they're going to be going to the doctors in a month's time. So why not?”*  
500 VCSEFG1 believed improving access and care for low-income families required *“a whole cultural*  
501 *system shift”*. VCSEInt1 highlighted the social and cultural (class) differences between senior  
502 healthcare professionals (i.e. GPs and consultants) and the communities they serve; they wanted  
503 medical students to experience more placements in deprived areas. In a similar vein, VCSEFG1 called  
504 for improved training for medical staff: *“raising awareness about all these different kind of groups*  
505 *that don't get access and why they don't get access.”* VCSEFG2 felt similarly, *“training is really*  
506 *important ... specifically about poverty and how that affects families.”* VCSEFG2 admitted to having  
507 little awareness of how much training in poverty issues different healthcare professionals receive  
508 and acknowledged that some professionals are *“seeing those issues all the time and [are] really*  
509 *aware of that”*. Nevertheless, they felt training and awareness to be very important.

510

#### 511 **4. Discussion**

512 The aim of this study was to identify barriers to healthcare access among families living on low  
513 incomes with the objective of designing an action-plan toolkit for poverty proofing healthcare  
514 settings used by children and their families. The following discussion summarises how the study has  
515 influenced the approach taken by CNE.

516 As a consultative model Poverty Proofing© Health (PPH) is grounded in the same ethos, principles  
517 and methodology as Poverty Proofing© the school day (table 1). However, the audit process for PPH  
518 has a wider training remit and a consultation phase that extends beyond the voice of the child to  
519 include a diverse range of people. This research provided evidence to strengthen CNE's existing audit  
520 approach to PPH, especially in the areas of staff training and suggested improvements, and the  
521 themes identified resonated with those CNE see in practice.

522 **Table 1. Ethical principles of Poverty Proofing©**

|                                |                                                                                                                                                          |
|--------------------------------|----------------------------------------------------------------------------------------------------------------------------------------------------------|
| <b>Voice</b>                   | To achieve real social change it is imperative that the voice of those affected by poverty is central to understanding and overcoming the barriers faced |
| <b>Place</b>                   | Alongside hearing from people, the context of the community and place needs to be understood                                                             |
| <b>Structural inequalities</b> | Structural changes at an organisational level can be addressed or at least alleviated by eliminating the barriers that those in poverty face             |

523

524 Following the research phase, CNE completed several PPH audits across different healthcare settings  
 525 (including GP Surgeries, Maternity services, Outpatients, Paediatric Diabetes, Palliative Care, Sexual  
 526 Health and Speech and Language). Whilst the terminology differed across settings there were clear  
 527 similarities between the thematic areas emerging in the audits and those identified in the research  
 528 (see table 2). This developed our thinking beyond an action-plan toolkit and led us to develop a  
 529 ‘Common Themes Framework’. The framework presents CNE and the PPH audit process with a  
 530 systematic, intelligence-led approach that underpins and sits across each of the five phases of the  
 531 PPH audit process. How this translates into practice is explored below.

532 **Table 2. Thematic Areas in Poverty Proofing© Health**

|                                     |                                                                                                                       |
|-------------------------------------|-----------------------------------------------------------------------------------------------------------------------|
| <b>Travel</b>                       | Affordability; convenience; transport poverty                                                                         |
| <b>Navigating &amp; Negotiating</b> | Hidden costs; systems and processes; policy and procedure                                                             |
| <b>Appointments</b>                 | procedure                                                                                                             |
| <b>Communication</b>                | Digitisation & digital inclusion; health literacy; responsibility to communication preferences, language and cultural |

---

|                                          |                                                                                                                                                                                                                     |
|------------------------------------------|---------------------------------------------------------------------------------------------------------------------------------------------------------------------------------------------------------------------|
|                                          | support                                                                                                                                                                                                             |
| <b>Staff awareness</b>                   | Staff knowledge, awareness and understanding of socio-economic circumstances and how to help; partnership arrangements and joined up working; culture, behaviour and attitudes of staff; practical help and support |
| <b>Patient Empowerment</b>               | Patient voice and participation; access to support and education; patient perceptions                                                                                                                               |
| <b>The additional costs of being ill</b> | Specialist equipment; food and fuel costs, therapeutic, wellbeing and associated costs                                                                                                                              |

---

533

## 534 **5.1 The Development of a Common Themes Framework**

535 A PPH audit has five phases, these are: (i) training and initial consultation with healthcare staff; (ii)  
536 scoping of the setting and how it works in practice; (iii) patient and community consultation; (iv)  
537 comprehensive report with recommendations; (v) review. In this section, we explain each phase,  
538 show how the common themes and suggested improvements that emerged in the research were  
539 integrated, and the impact this had.

### 540 **5.1.1 Training**

541 Research participants felt healthcare staff would benefit from training, specifically about poverty  
542 and how it affects families. Whilst PPH always contained training, this phase has been revised to  
543 embed the common themes with the aim of raising awareness amongst healthcare staff of the  
544 barriers people face in accessing healthcare (i.e., travel, subsistence, accessing appointments,  
545 navigating the health system and relationships with healthcare providers). Facilitated consultation at  
546 the end of training sessions allows CNE coordinators to frame the consultation around these  
547 common themes and to draw out how staff experience the challenges of poverty in their work. This  
548 is essential to co-production, building relationships and understanding both structural barriers and



549 the challenges staff face in delivering poverty informed services.

550

### 551 **5.1.2 Scoping**

552 A set of prompts, relating to the research themes, have been designed and implemented to ensure  
553 PPH coordinators are informed and consistent in observations, conversations and paper-based  
554 enquiries whilst scoping and orienting the work in relation to each setting. Our scoping now includes  
555 gaining an awareness of the healthcare setting's policies, processes and procedures that are most  
556 likely to impact families on low incomes (such as discharge policies and travel reimbursement  
557 schemes) and unpicking the mechanisms for signposting to support services, appointment booking  
558 systems and so on. This activity helps to discern between what is fact, what is policy and what is  
559 perception in both staff and members of the public.

### 560 **5.1.3 Consultations**

561 The 'Common Themes Framework' also feeds into the way questions are posed during community  
562 consultations to emphasise those issues amplified by living on a low income and navigate away from  
563 questions that focus on challenges relating to those wider NHS pressures that most people  
564 experience, irrespective of income. The questions are designed to ensure that all common themes  
565 are addressed in a systematic way, whilst also allowing space for new themes and underdeveloped  
566 areas to emerge.

### 567 **5.1.4 Feedback & Reporting**

568 A key feature of feedback and reporting is making recommendations and suggested improvements  
569 based on the findings from the PPH audit. CNE use a strengths-based approach that specifically seeks  
570 out what is working well in each setting and how it supports people living with poverty, as well as  
571 understanding the challenges and barriers to doing this. The improvements suggested by research  
572 participants are now included in a growing bank of recommendations that are drawn on when  
573 feeding back to organisations. PPH is delivered at place and the breadth and geography of settings

574 means recommendations cannot be standardised or generalizable. However, having a bank of  
575 recommendations helps with efficacy and consistency where findings are similar. For example, travel  
576 is a topic that arises frequently. Therefore, understanding that the NHS low-income scheme includes  
577 travel reimbursement and ensuring the process for this is shared clearly and personally is one  
578 practical example of how healthcare staff can help close the travel inequality gap. Another is around  
579 asking about finances, universally, as part of patient care as a way of opening up the conversation so  
580 the right support can be identified. If this question is not asked healthcare staff can be unaware of  
581 patients' financial difficulties and this can lead to assumptions, unconscious bias and missed  
582 opportunities to provide support.

### 583 **5.1.5 Impact and Monitoring**

584 The 'Common Themes Framework' is reflexive in its nature and there is space within it to respond  
585 and grow to accommodate new knowledge and themes as they emerge. Structuring each audit  
586 around common themes means findings can be quantified and analysed by locality, theme and  
587 setting type. This then contributes to a broader framework of monitoring impact at scale, providing  
588 insight into common themes that contribute to health inequality in a way that can be pinpointed and  
589 articulated to policy and decision makers.

## 590 **5. Conclusion**

591 Current pressures on the UK's NHS have resulted in access to healthcare being challenging to almost  
592 all who use it. For those living on low incomes these challenges are exacerbated in many ways, as  
593 demonstrated by this research. Our findings show that despite NHS services being free at the point  
594 of delivery, low income can be a barrier to accessing healthcare. Poverty restricts access to  
595 healthcare for children and perpetuates inequities in health, education and life opportunities. These  
596 barriers are not inevitable. The findings of this research have informed CNE's approach to working  
597 with healthcare providers to help them reduce the impacts poverty has on healthcare access using  
598 their 'Poverty Proofing© Health audit approach'. The development of a 'Common Themes

599 Framework' ensures audits across different settings are consistent, replicable, systematic and  
600 intelligence led.

## 601 **Acknowledgements**

602 The authors wish to acknowledge the parent and VCSE participants who contributed to this study  
603 and the VCSE organisations who helped us engage with families. We would also like to thank Lorna  
604 Nicoll from CNE for proofreading this paper.

## 605 **Research Data**

606 Due to the sensitive nature of the questions asked in this study and personal information shared, as  
607 well as our ethics approval, research participants were assured raw data would remain confidential  
608 and would not be shared.

## 609 **Funding**

610 The study was funded by the National Institute for Health and Care Research (NIHR) Applied  
611 Research Collaboration (ARC) North East and North Cumbria (NIHR200173). The NIHR ARC NENC  
612 played no role in the collection, analysis and interpretation of data, writing of the report, and in the  
613 decision to submit the article for publication; the views expressed are those of the author(s) and not  
614 necessarily those of the NIHR or the Department of Health and Social Care.

615

## 616 **References**

617 [1] D'Arcy C, Goulden C. A definition of poverty. Joseph Rowntree Foundation. 2012. Available from:  
618 <https://www.jrf.org.uk/report/definition-poverty>.

619 [2] Mon-Williams M, Wood ML, et al. (2023). Addressing Education and Health Inequity: Perspectives  
620 from the North of England. A report prepared for the Child of the North APPG [Internet]. 2023 [cited

- 621 13 September 2023]. Available from: <https://www.healthequitynorth.co.uk/app/uploads/APPG->  
622 [REPORT-SEPT-23.pdf](https://www.healthequitynorth.co.uk/app/uploads/APPG-REPORT-SEPT-23.pdf).
- 623 [3] Wickham S, Anwar. E, Barr B, Law C, Taylor-Robinson D. Poverty and child health in the UK: using  
624 evidence for action. Arch. Dis. Child. 2016; 101(8):759–766. [https://doi.org/10.1136/archdischild-](https://doi.org/10.1136/archdischild-2014-306746)  
625 [2014-306746](https://doi.org/10.1136/archdischild-2014-306746).
- 626 [4] Wykes T, Bell A, Carr S, Coldham T, Gilbody S, Hotopf M, et al. Shared goals for mental health  
627 research: What, why and when for the 2020s. J Ment Health [internet]. 2021 March [cited 9 August  
628 2023]. <https://doi.org/10.1080/09638237.2021.1898552>.
- 629 [5] Rod NH, Bengtsson J, Budtz-Jorgensen E, Clipet-Jensen C, Taylor-Robinson D, Nybo A, et al.  
630 Trajectories of childhood adversity and mortality in early adulthood: a population-based cohort  
631 study, Lancet. 2020;396(10249):489-497. [https://doi.org/10.1016/S0140-6736\(20\)30621-8](https://doi.org/10.1016/S0140-6736(20)30621-8)
- 632 [6] Dyer F. The Good Childhood Report, Supporting the well-being of children and young people, a  
633 worship resource for churches and church groups. The Children's Society [Internet]. 2019 [cited 9  
634 August 2023]. Available from: [https://southwark.anglican.org/wp-content/uploads/2020/12/Good-](https://southwark.anglican.org/wp-content/uploads/2020/12/Good-Childhood-Whole-Church.pdf)  
635 [Childhood-Whole-Church.pdf](https://southwark.anglican.org/wp-content/uploads/2020/12/Good-Childhood-Whole-Church.pdf).
- 636 [7] Bidmead E, El Zerbi C, Cheetham M Frost S. A rapid review of children and young people’s views  
637 of poverty and welfare in the context of Universal Credit. Child Soc 00. [Preprint] 2023. Available  
638 from: <https://doi.org/10.1111/chso.12728>.
- 639 [8] Child Poverty Action Group, Child Poverty Facts and Figures [Internet]. 2023 [cited 9 August  
640 2023]. Available from: <https://cpag.org.uk/child-poverty/child-poverty-facts-and-figures>.
- 641 [9] North East Child Poverty Commission, New government figures show North East child poverty  
642 remains shockingly high [Internet]. 2023 [cited 9 August 2023]. Available from:  
643 <https://nechildpoverty.org.uk/>.

- 644 [10] Pickett K, et al. Child of the North: Building a fairer future after COVID-19. 2021. Northern  
645 Health Science Alliance and N8 Research Partnership [Internet]. 2021 [cited 9 August 2023].  
646 Available from: [https://www.thenhsa.co.uk/app/uploads/2022/01/Child-of-the-North-Report-FINAL-](https://www.thenhsa.co.uk/app/uploads/2022/01/Child-of-the-North-Report-FINAL-1.pdf)  
647 [1.pdf](https://www.thenhsa.co.uk/app/uploads/2022/01/Child-of-the-North-Report-FINAL-1.pdf).
- 648 [11] Mazzoli Smith L, Todd L. Poverty proofing the school day: evaluation and development report  
649 [Internet] 2016 [cited 9 August 2023]. Available from:  
650 [https://eprints.ncl.ac.uk/file\\_store/production/232454/86F983AD-4159-4FE1-9F37-](https://eprints.ncl.ac.uk/file_store/production/232454/86F983AD-4159-4FE1-9F37-3B567F2182C2.pdf)  
651 [3B567F2182C2.pdf](https://eprints.ncl.ac.uk/file_store/production/232454/86F983AD-4159-4FE1-9F37-3B567F2182C2.pdf).
- 652 [12] Morris S, Sutton M, Gravelle H. Inequity and inequality in the use of healthcare in England: an  
653 empirical investigation. *Soc Sci Med* 60(6), (2005) 1251–1266.  
654 <https://doi.org/10.1016/j.socscimed.2004.07.016>.
- 655 [13] Cookson R, Propper RC, Asaria M, Raine R. Socio-Economic Inequalities in Healthcare in England,  
656 *Fisc Stud* 37(3-4), (2016) 371–403. <https://doi.org/10.1111/j.1475-5890.2016.12109>.
- 657 [14] Francis-Devine B. Research Briefing: Poverty in the UK: statistics, House of Commons Library  
658 [Internet] 2023 [cited 9 August 2023]. Available from:  
659 <https://commonslibrary.parliament.uk/research-briefings/sn07096/>.
- 660 [15] Tong A, Sainsbury P, Craig J. Consolidated criteria for reporting qualitative research (COREQ): a  
661 32-item checklist for interviews and focus groups. *Int J Qual Healthcare*. 2007 19(6):349 – 357.  
662 <https://doi.org/10.1093/intqhc/mzm042>.
- 663 [16] Braun V, Clarke V. *Thematic analysis: a practical guide*. Los Angeles: SAGE; 2021.
